# Supplementary material for: Temperature-induced formation of Pd nanoparticles in heterogeneous nanobiohybrids: application in C–H activation catalysis
Source: Royal Society of Chemistry journal article supplement (doi:10.1039/d2na00742h), 2022-12-20
Supplement: d2na00742h1.pdf [file d2na00742h1.pdf]

## Electronic Supplementary Information

### Temperature-induced formation of Pd nanoparticles in heterogeneous nanobiohybrids: application in C-H activation catalysis

Noelia Losada-Garcia<sup>a, †</sup>, A. Sofia Santos<sup>a,b, †</sup>, M. Manuel B. Marques<sup>b</sup> and

Jose M. Palomo<sup>\*a</sup>

<sup>a</sup> Instituto de Catálisis y Petroleoquímica (ICP), CSIC. C/Marie Curie 2. 28049 Madrid (Spain). \*E-mail: [josempalomo@icp.csic.es](mailto:josempalomo@icp.csic.es)

<sup>b</sup> LAQV@REQUIMTE, Department of Chemistry, NOVA School of Science and Technology. Universidade Nova de Lisboa, 2829-516 Caparica (Portugal).

<sup>†</sup> Both authors contributed equally.

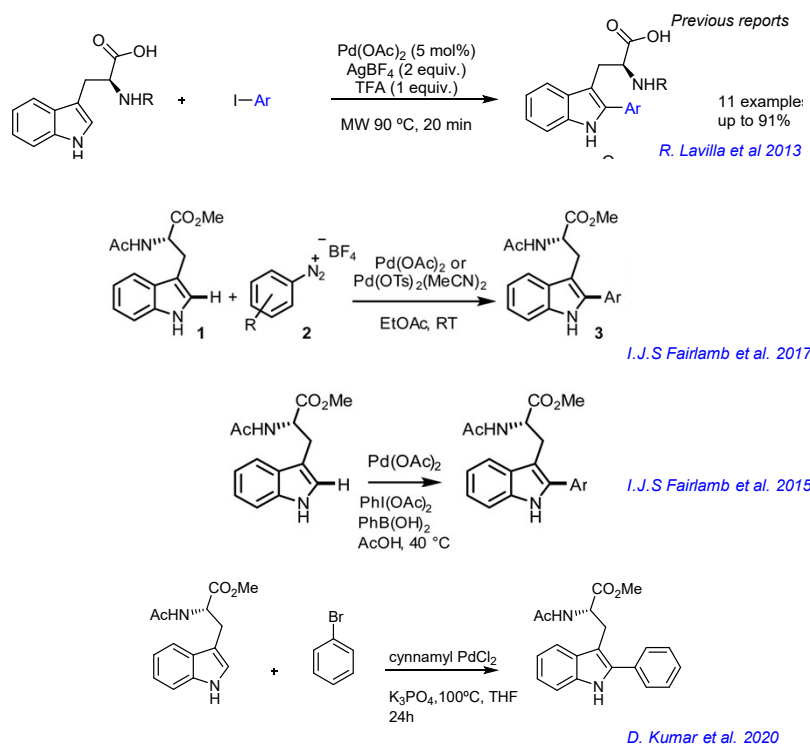

**Scheme S1.** Selected examples of recent reports of C-H activation of tryptophan derivatives catalysed by Pd molecules.

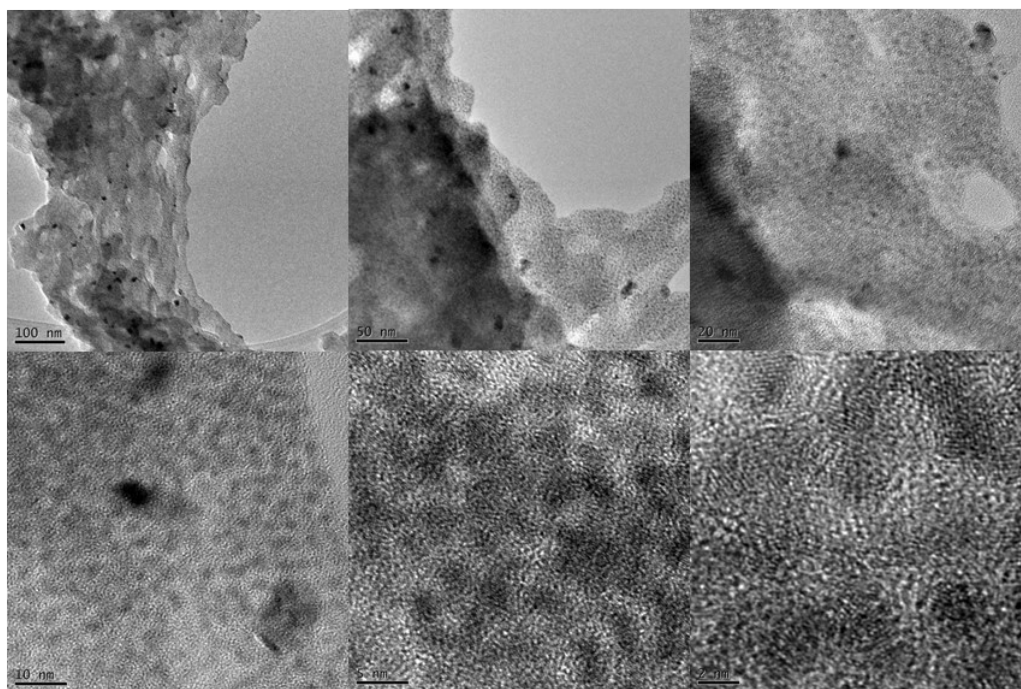

**Figure S1.** TEM and HR-TEM images of Pd@CALB4.

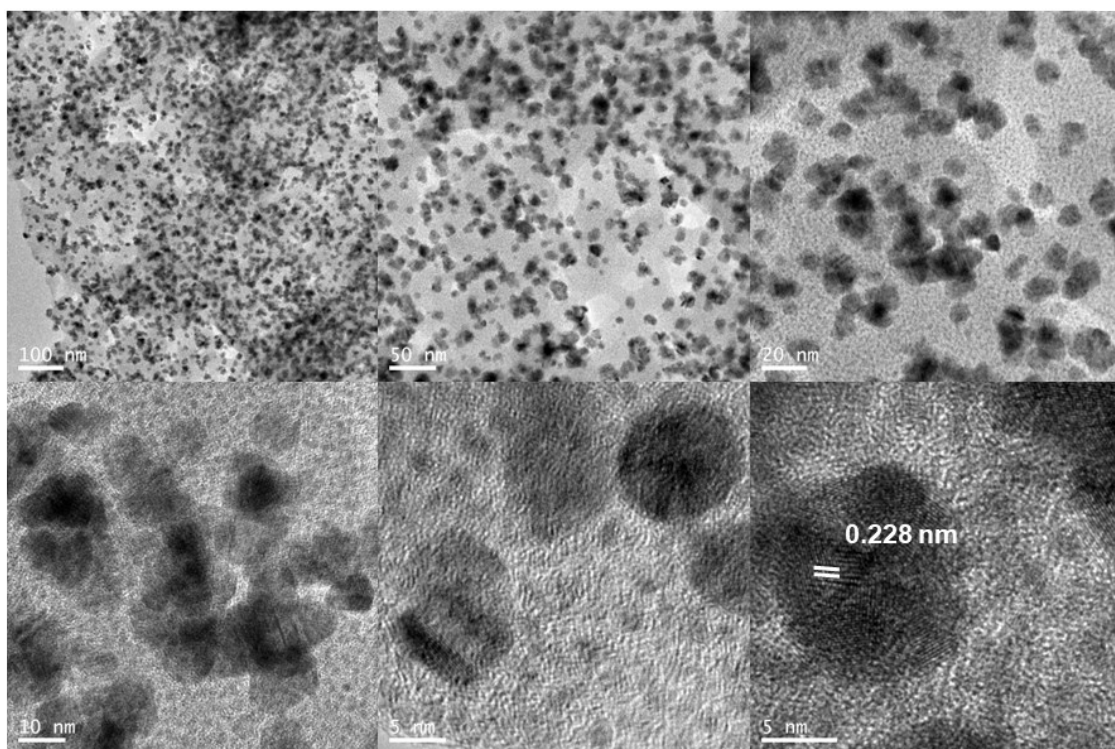

**Figure S2.** TEM and HR-TEM images of Pd@CALB50.

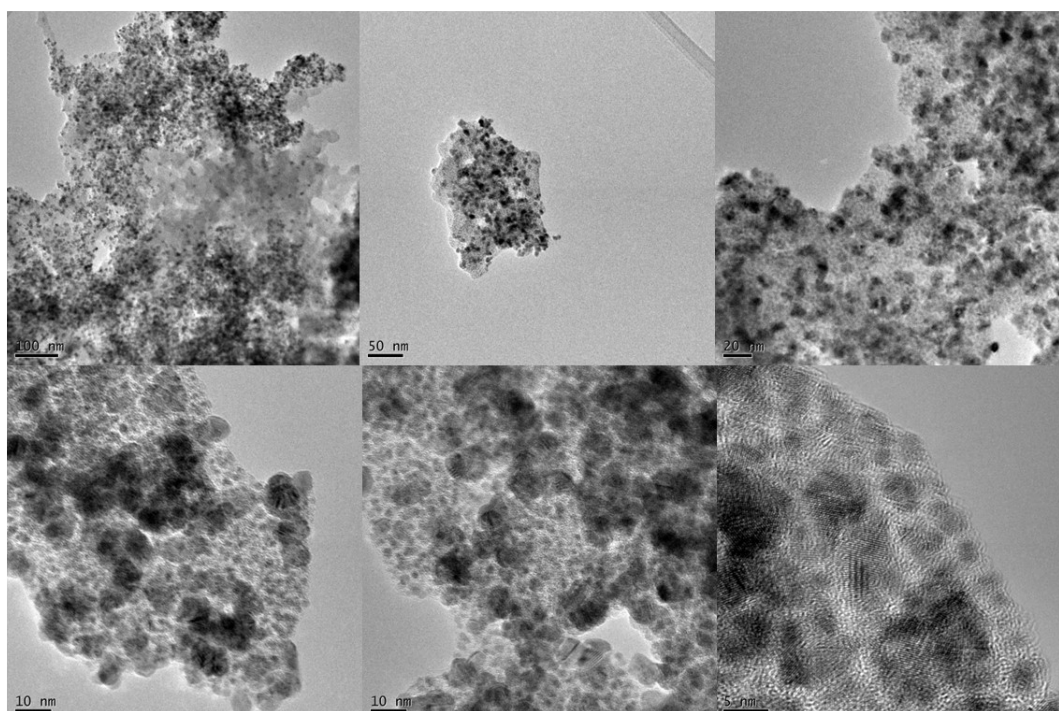

**Figure S3.** TEM and HR-TEM images of Pd@CALB60.

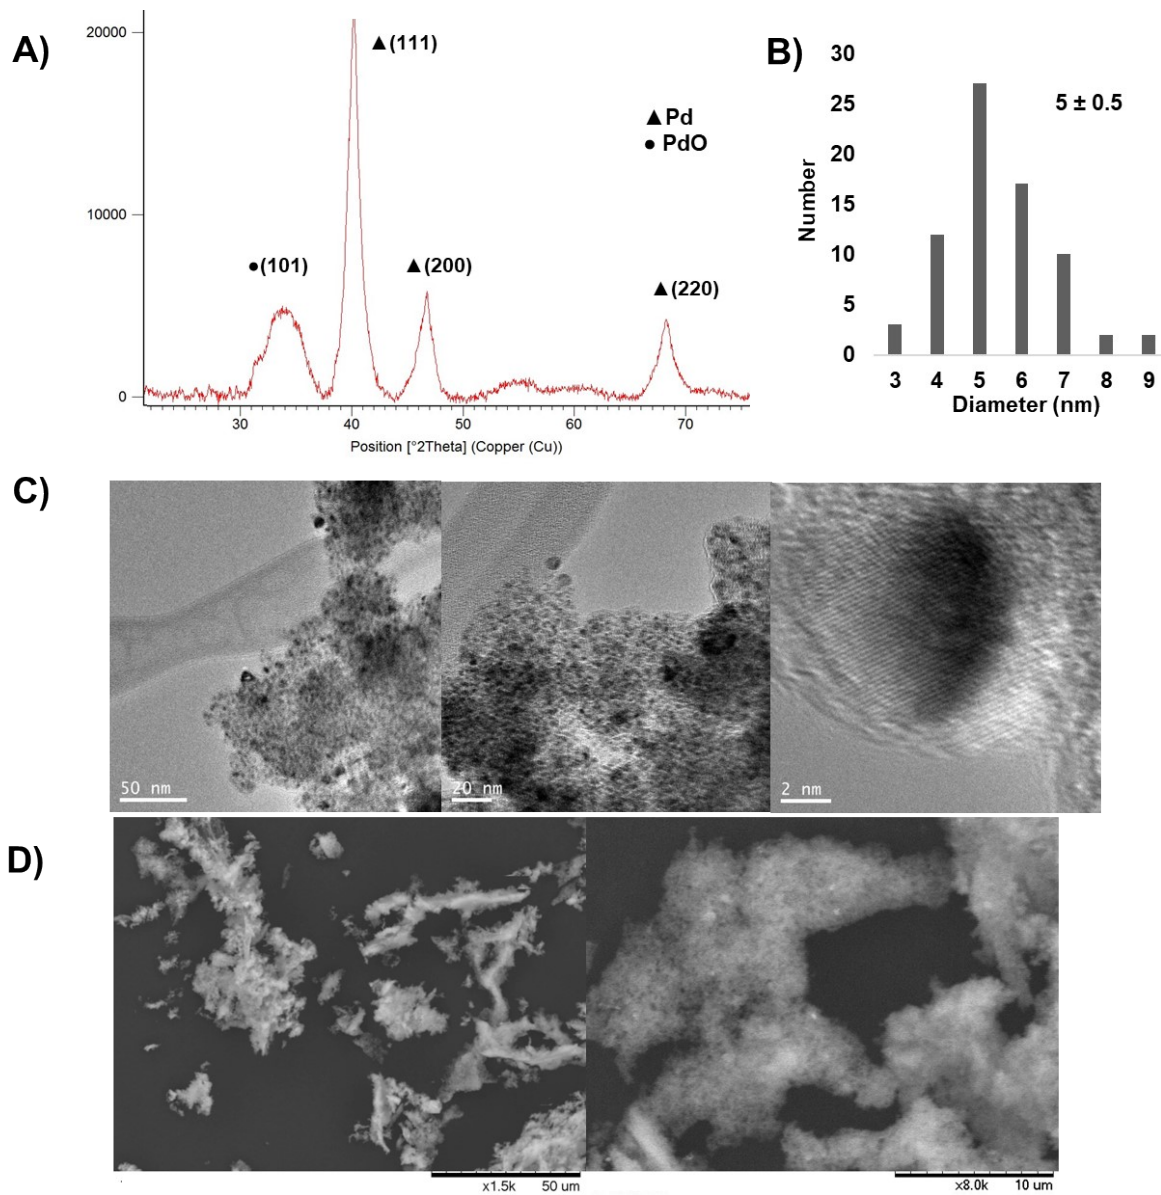

**Figure S4.** Characterization of Pd@TLL25. **A)** XRD spectrum; **B)** Particle size distribution; **C)** TEM and HR-TEM images; **D)** SEM images.

|                                                       |                   |                   |                   |                   |
|-------------------------------------------------------|-------------------|-------------------|-------------------|-------------------|
| 10                                                    | 20                | 30                | 40                | 50                |
| MRSSLVLFV                                             | SAWTALASPI        | RREVSQDLFN        | QFNLFAQYSA        | AAYCGKNDA         |
| 60                                                    | 70                | 80                | 90                | 100               |
| PAGTNITCTG                                            | NACPEVEKAD        | ATFLYSFEDS        | GVGDTVGF          | LDNTNKLIVL        |
| 110                                                   | 120               | 130               | 140               | 150               |
| SFRGSRSIEN                                            | WIGNLNFDLK        | EINDICSGCR        | GHDGFTSSWR        | SVADTLRQKV        |
| 160                                                   | 170               | 180               | 190               | 200               |
| <b>EDAVREHPDY</b>                                     | <b>RVVFTGHSLG</b> | <b>GALATVAGAD</b> | <b>LRGNGYDIDV</b> | <b>FSYGAPRVGN</b> |
| 210                                                   | 220               | 230               | 240               | 250               |
| RAFAEFLTVQ                                            | <b>TGGTLYRITH</b> | <b>TNDIVPRLPP</b> | <b>REFGYSHSSP</b> | <b>EYWIKSGTLV</b> |
|                                                       |                   |                   |                   |                   |
| PVTRNDIVKI EGIDATGGNN QPNIP <b>DIPAH</b> LWYFGLIGTC L |                   |                   |                   |                   |

**Length:**291

**Mass (Da):**31,807

**Figure S5.** Amino acids sequence of TLL. Asp, Glu and His in bold. Sequence was obtained from <https://www.uniprot.org/uniprot/O59952>

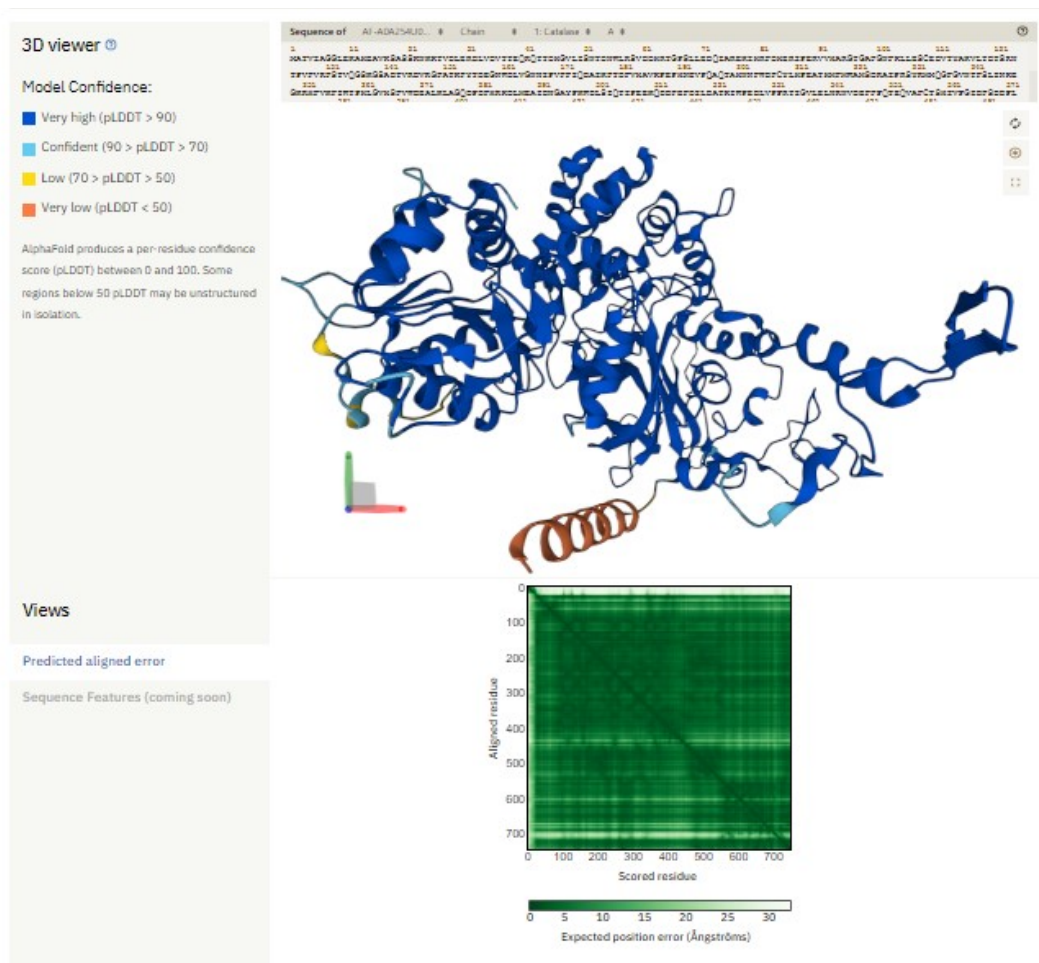

**Figure S6.** Predicted structure of catalase by AlphaFold, artificial intelligent system developed by DeepMind.



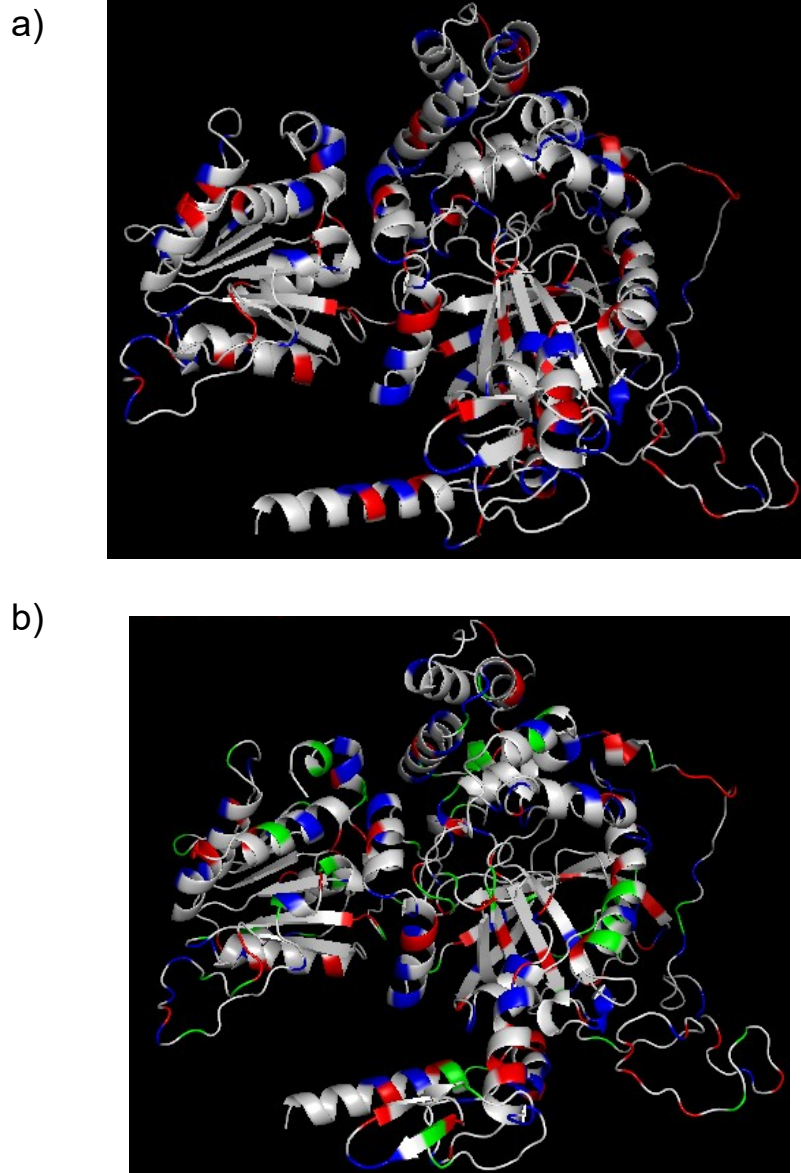

**Figure S7.** Three-dimensional structure of monomer of tetrameric catalase from *Aspergillus niger*. Structure predicted by AlphaFold and PDB was from AlphaFold. <https://alphafold.ebi.ac.uk/entry/A0A254U0S5>. Jumper, J *et al.* Highly accurate protein structure prediction with AlphaFold. *Nature* (2021). Image was prepared using Pymol 2.0 software. A) Image structure with Asp and Glu (blue) and Lys and Arg (red). C) Image structure with Asp and Glu (blue), Lys and Arg (red) and Cys, Ser and Tyr (green).

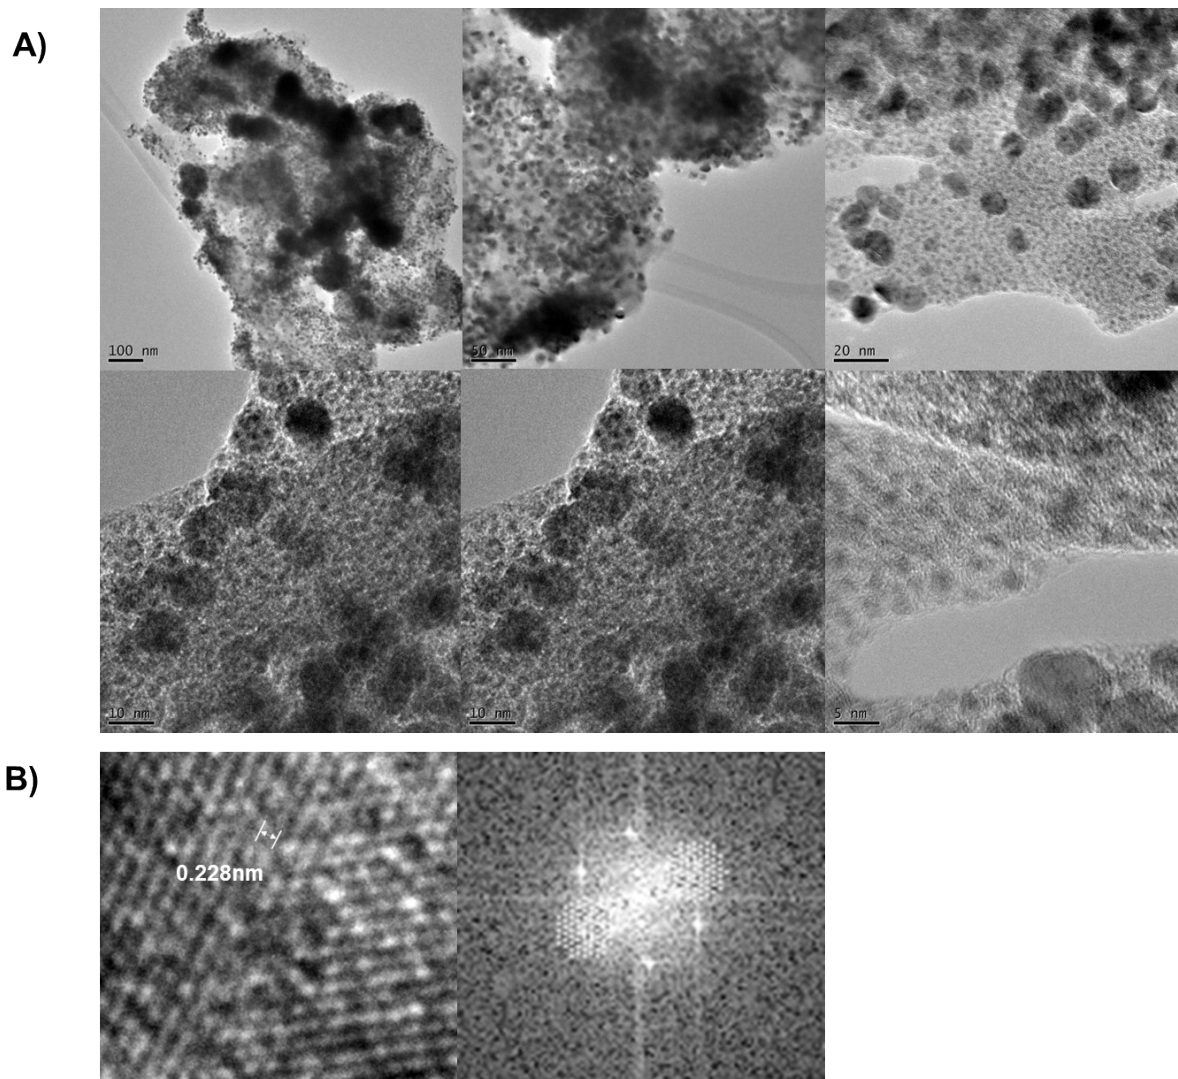

**Figure S8.** Characterization of Pd@CAT50. **A)** TEM and HR-TEM images; **B)** FFT and IFFT analysis.

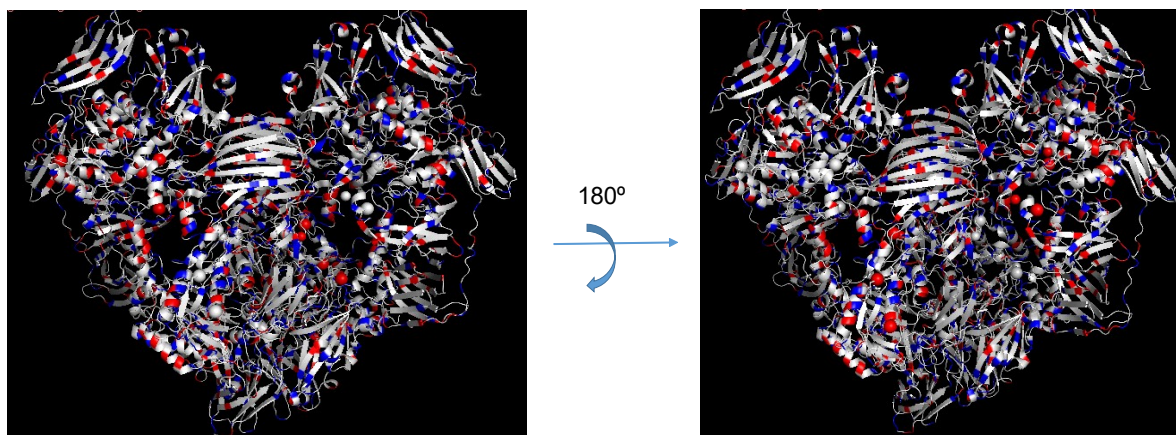

**Figure S9.** Three-dimensional structure of beta-galactosidase from *Kluyveromyces lactis*. 3OB8 from PDB bank. Structure determined in ref: Pereira-Rodriguez, A., Fernandez-Leiro, R., Gonzalez-Siso, M.I., Cerdan, M.E., Becerra, M., Sanz-Aparicio, J. *Structural basis of specificity in tetrameric Kluyveromyces lactis* beta-galactosidase. *J Struct Biol.* 2012, 177, 392-401. Asp and Glu (blue), Lys, Arg (red). Mn, Mg (grey balls), Na ions (red balls).

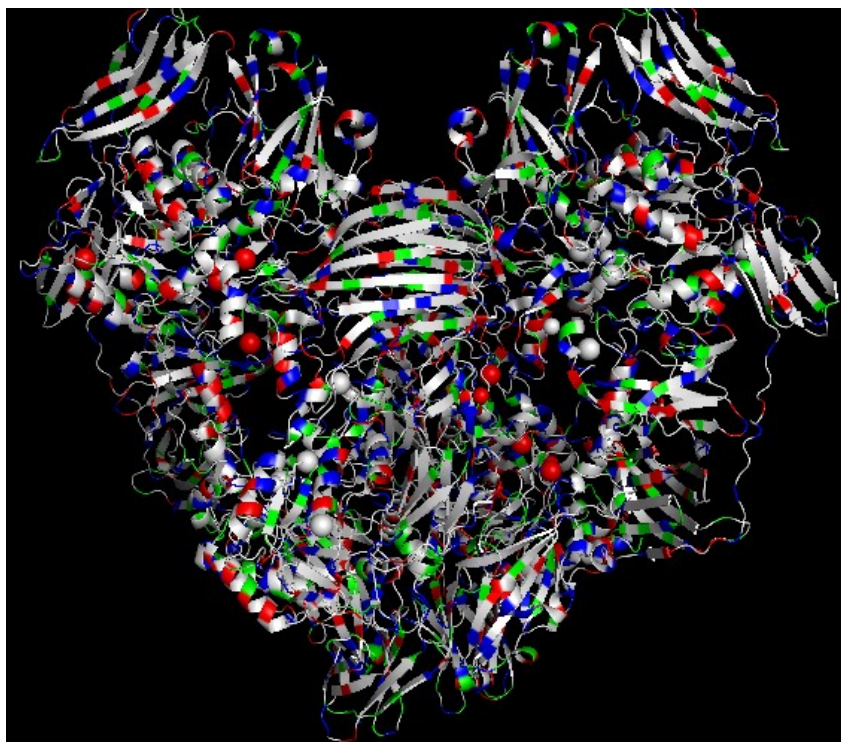

**Figure S10.** Three-dimensional structure of beta-galactosidase from *Kluyveromyces lactis*. 3OB8 from PDB bank. Structure determined in ref: Pereira-Rodriguez, A., Fernandez-Leiro, R., Gonzalez-Siso, M.I., Cerdan, M.E., Becerra, M., Sanz-Aparicio, J. Structural basis of specificity in tetrameric *Kluyveromyces lactis* beta-galactosidase. *J Struct Biol.* 2012, 177, 392-401. Asp and Glu (blue), Lys, Arg (red) and Cys, Ser and Tyr (green). Mn, Mg (grey balls), Na ions (red balls).

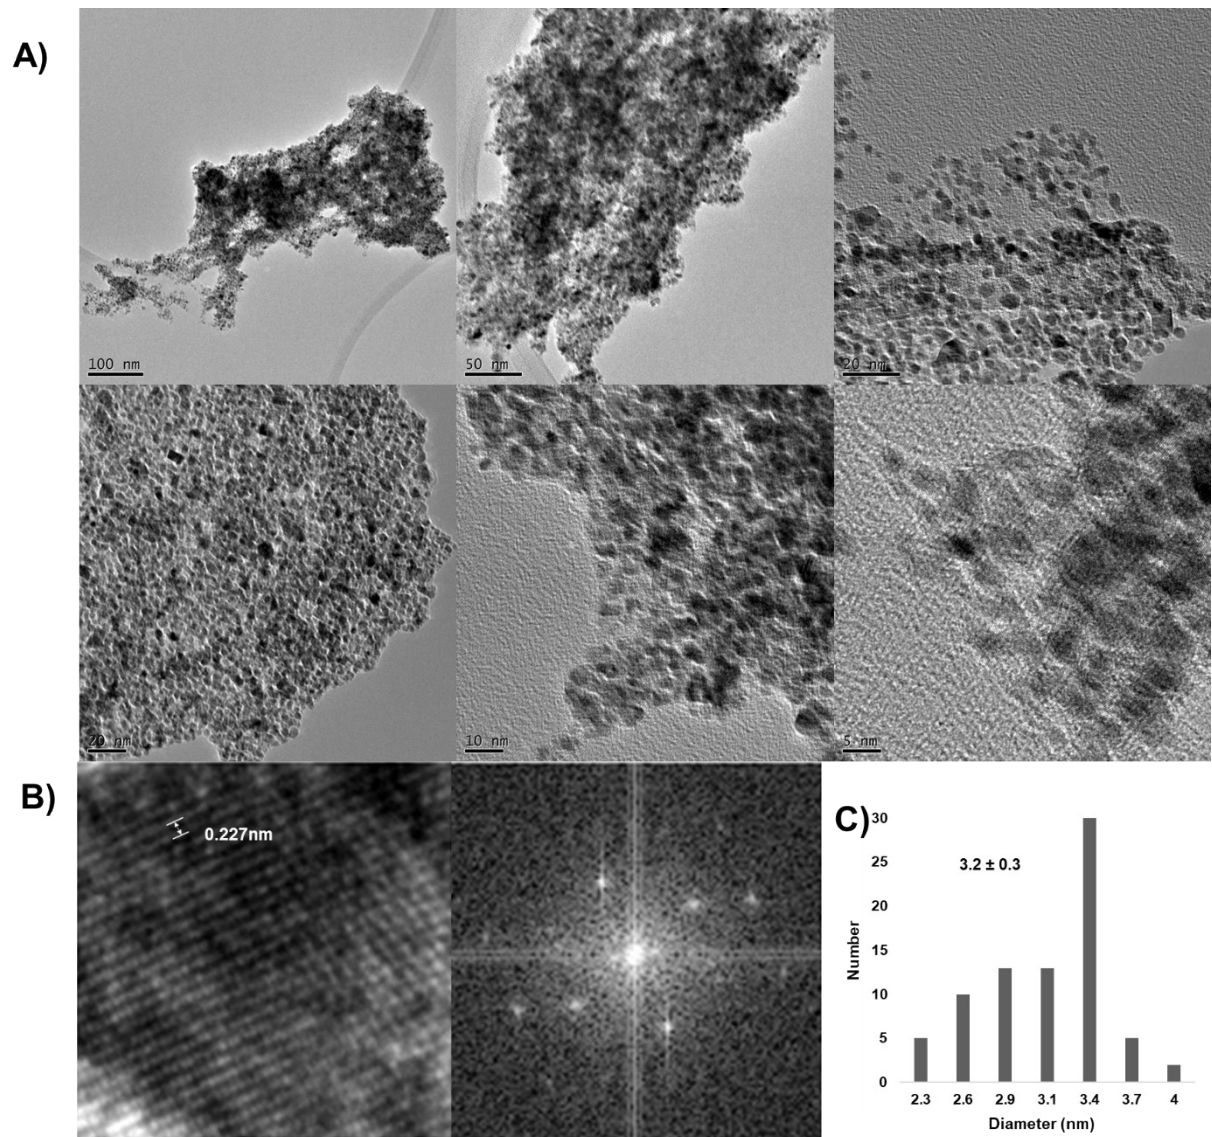

**Figure S11.** Characterization of Pd@LAC70. **A)** TEM and HR-TEM images; **B)** FFT and IFFT analysis; **C)** Particle size distribution.

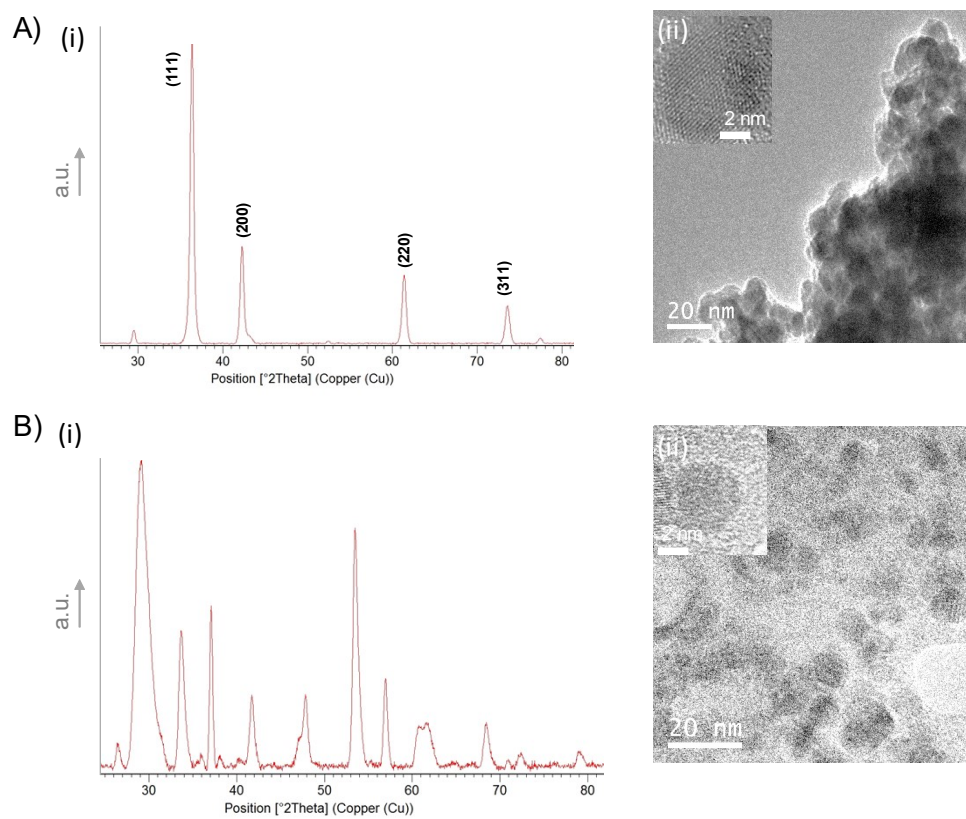

**Figure S12.** Characterization of Cu hybrids. A) Cu-FOS2. B) Cu-NR. i) XRD analysis, ii) TEM image (inset HRTEM).

**Table S1.** Determination of Pd% and yield of Pd deposition in the different Pd@enzyme hybrids.

| <b>Pd Hybrids</b> | <b>Pd employed (<math>\mu\text{mol}</math>)</b> | <b>Pd content (w/w %)<sup>a</sup></b> | <b>Amount of Hybrid (mg)</b> | <b>Pd Deposited (<math>\mu\text{mol}</math>)</b> | <b>Pd Deposition yield (%)</b> |
|-------------------|-------------------------------------------------|---------------------------------------|------------------------------|--------------------------------------------------|--------------------------------|
| <b>Pd@CALB4</b>   | 188                                             | 15                                    | 23                           | 32.43                                            | 17                             |
| <b>Pd@CALB25</b>  | 188                                             | 26                                    | 24                           | 58.65                                            | 31                             |
| <b>Pd@CALB50</b>  | 188                                             | 22                                    | 16                           | 33.08                                            | 18                             |
| <b>Pd@CALB60</b>  | 188                                             | 22                                    | 23                           | 47.56                                            | 25                             |
| <b>Pd@TLL25</b>   | 188                                             | 35                                    | 14                           | 46.06                                            | 24                             |
| <b>Pd@CAT50</b>   | 188                                             | 33                                    | 0.6                          | 1.86                                             | 1                              |
| <b>Pd@LAC70</b>   | 188                                             | 64                                    | 9.4                          | 56.55                                            | 30                             |

<sup>a</sup> Determined by ICP\_OES analysis. The measurement was performed of the solid material. 1 mg of the solid powder was treated with 5 mL of HCl (37% v/v) for digestion. Then, it was added with 5 mL of water, centrifuged and the clear solution analyzed by Pd content.
